# Supplementary material for: A Novel Electrochemical Sensor Modified with a Computer-Simulative Magnetic Ion-Imprinted Membrane for Identification of Uranyl Ion
Source: MDPI journal article supplement (doi:10.3390/s22124410), 2022-06-10
Supplement: s1 [file s1]

## Electronic supporting information

### A Novel Electrochemical Sensor Modified With a Computer-simulative Magnetic Ion-imprinted Membrane for Identification of Uranyl Ion

Li-Qiong He<sup>1,†</sup>, Zhi-Mei Wang<sup>2,†</sup>, Yu-Jie Li<sup>2</sup>, Jing Yang<sup>3</sup>, Li-Fu Liao<sup>4</sup>, Xi-Lin Xiao<sup>1,2,4,5\*</sup> and Yong Liu<sup>2,\*</sup>

1 Hunan Key Laboratory of Typical Environmental Pollution and Health Hazards, School of Public Health, Hengyang Medical School, University of South China, Hengyang 421001, China; 20202014110972@stu.usc.edu.cn (L.-Q.H.)

2 School of Resource & Environment and Safety Engineering, University of South China, Hengyang 421001, China; 17872110128@163.com (Z.-M.W.); 20192002210069@stu.usc.edu.cn (Y.-J.L.)

3 Hengyang Market Supervision Inspection and Testing Center, Hengyang 421001, China; yjawb11@163.com (J.Y.)

4 School of Chemistry and Chemical Engineering, University of South China, Hengyang 421001, China; llfcxllc@163.com (L.-F.L.)

5 State Key Laboratory of Chemo & Biosensing and Chemometrics, Hunan University, Changsha 410082, China

\* Correspondence: xiaoxl2001@163.com (X.-L.X.); 210000176367@usc.edu.cn (Y.L.)

† These authors contributed equally to this work.

#### Figure Captions

**Figure S1** Optimized conformation of 1H-PPCA, 2-HP, 3-HP, H<sub>2</sub>SA, DHP, H<sub>2</sub>Pdc, 3-PCA.

**Figure S2** The TEM images of (A) Fe<sub>3</sub>O<sub>4</sub>, (B) Fe<sub>3</sub>O<sub>4</sub>@SiO<sub>2</sub>.

**Figure S3** The EIS of (a) MIIP/MCPE, (b) MIIP/Fe<sub>3</sub>O<sub>4</sub>@SiO<sub>2</sub>/MCPE (after removal of the template), (c) MIIP/Fe<sub>3</sub>O<sub>4</sub>@SiO<sub>2</sub>/MCPE (after enrichment in 1.5×10<sup>-7</sup> mol L<sup>-1</sup> UO<sub>2</sub><sup>2+</sup> solution), (d) MIIP/Fe<sub>3</sub>O<sub>4</sub>@SiO<sub>2</sub>/MCPE (before elution of the template), (e) MCPE; (f) N-MIIP/Fe<sub>3</sub>O<sub>4</sub>@SiO<sub>2</sub>/MCPE (impedance spectrum at 2 mmol L<sup>-1</sup> K<sub>3</sub>Fe(CN)<sub>6</sub>/K<sub>4</sub>Fe(CN)<sub>6</sub>).

**Figure S4** The current response of the sensor was prepared with different crosslinking agents.

**Figure S5** The amount of crosslinking agent EGDMA (A), the amount of AIBN (B) and the reaction time of forming imprinted membrane (C).

**Figure S6** The effect of inorganic acid eluent on MIIP/Fe<sub>3</sub>O<sub>4</sub>@SiO<sub>2</sub>/MCPE determination of uranyl ions

**Figure S7** (A) The effect of repeatability (a: 0.20 mol L<sup>-1</sup>, b: 0.15 mol L<sup>-1</sup>, c: 0.10 mol L<sup>-1</sup> UO<sub>2</sub><sup>2+</sup> solution) on MIIP/Fe<sub>3</sub>O<sub>4</sub>@SiO<sub>2</sub>/MCPE; (B) Stability analysis of the sensing platform under 30 days with 0.15 μM target UO<sub>2</sub><sup>2+</sup> (orange), without target (green). The illustrated error bars represent the standard error of at least three independent measurements (n=3).

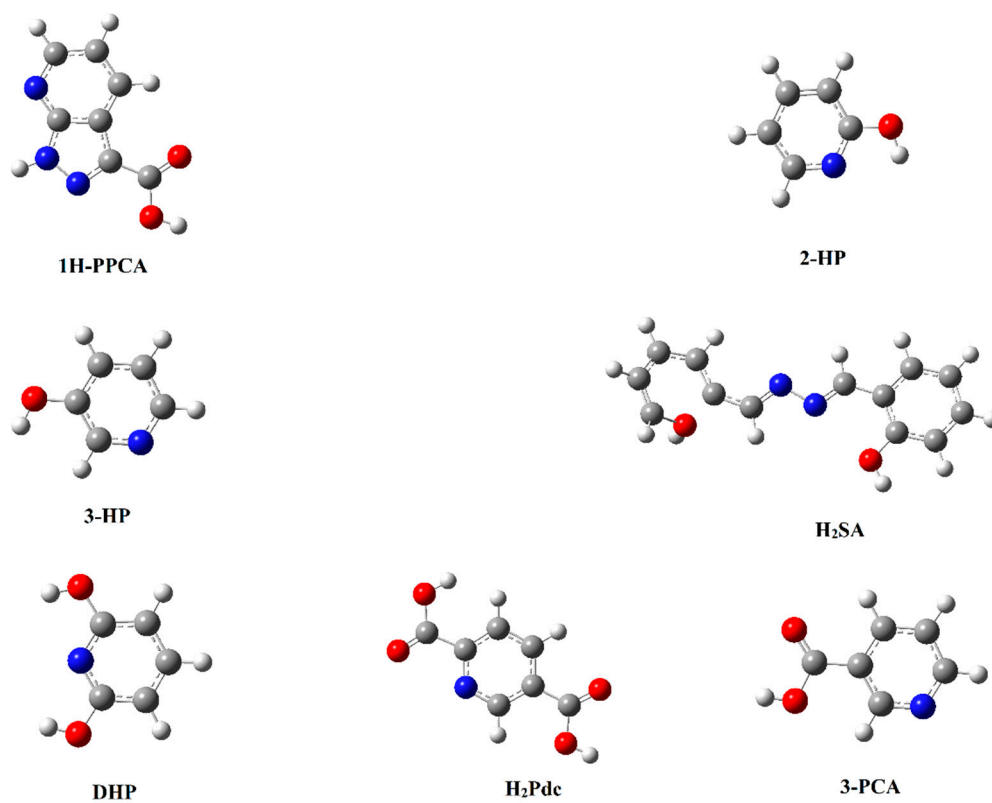

**Figure S1** Optimized conformation of 1H-PPCA, 2-HP, 3-HP, H<sub>2</sub>SA, DHP, H<sub>2</sub>Pdc, 3-PCA.

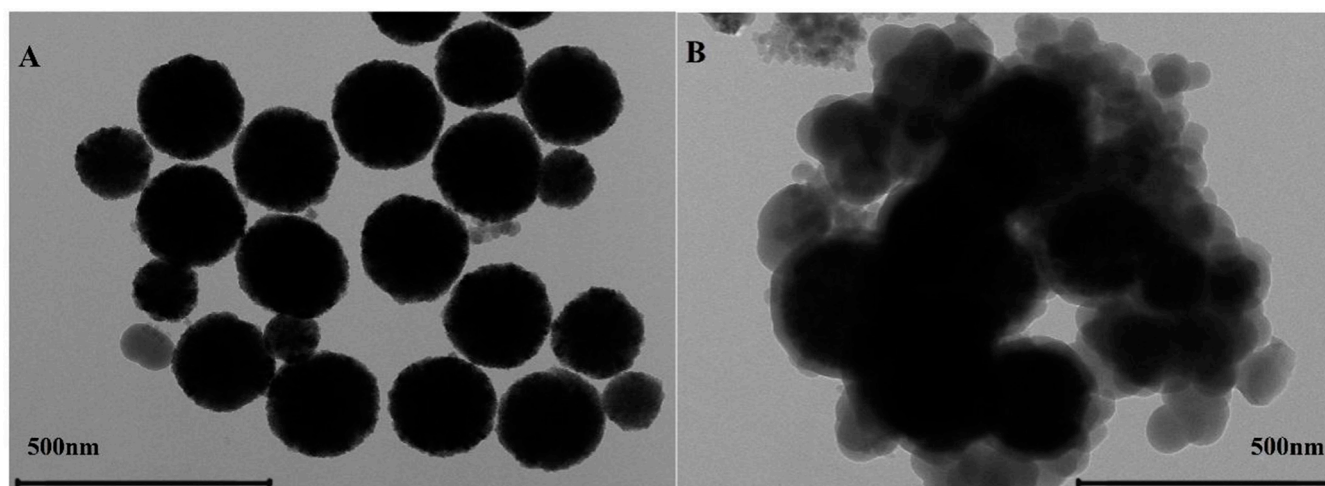

**Figure S2** The TEM images of (A) Fe<sub>3</sub>O<sub>4</sub>, (B) Fe<sub>3</sub>O<sub>4</sub>@SiO<sub>2</sub>.

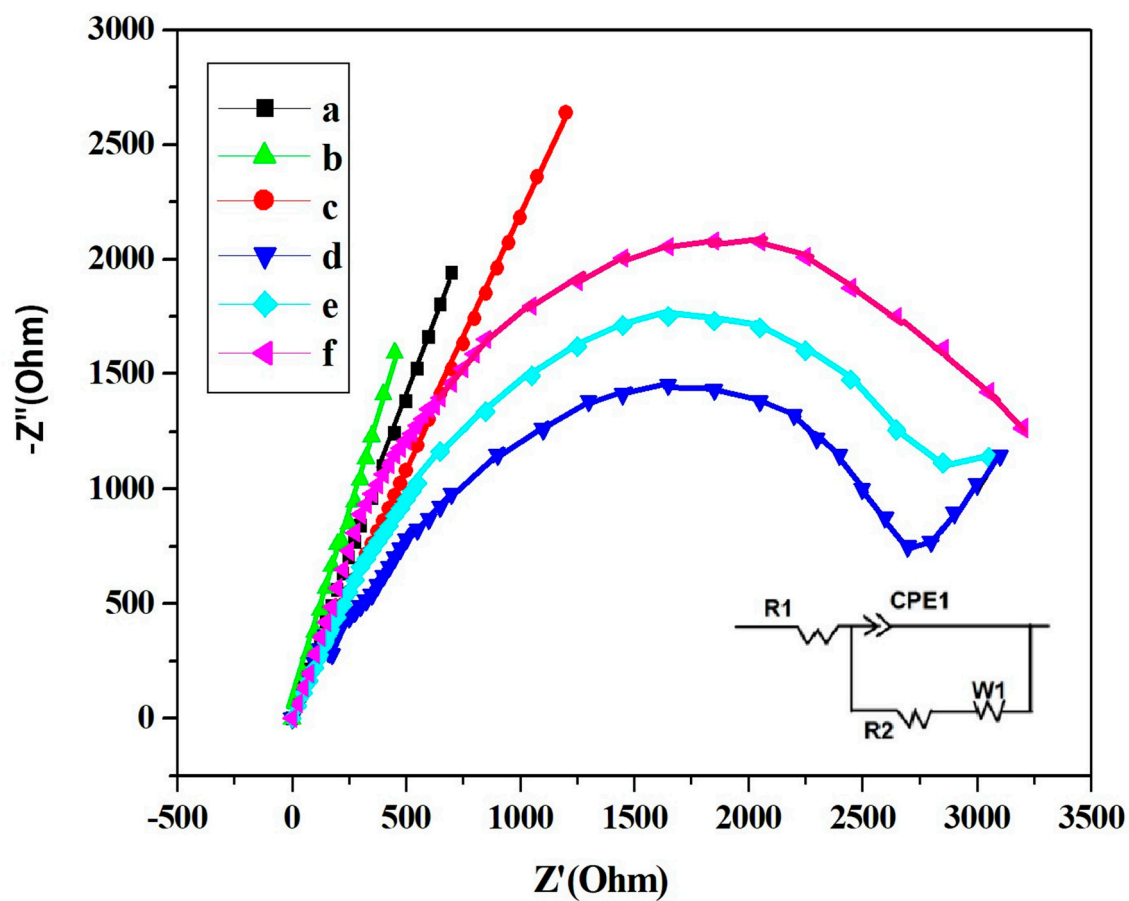

**Figure S3** The EIS of (a) MIIP/MCPE, (b) MIIP/Fe<sub>3</sub>O<sub>4</sub>@SiO<sub>2</sub>/MCPE (after enrichment in  $1.5 \times 10^{-7}$  mol L<sup>-1</sup> UO<sub>2</sub><sup>2+</sup> solution), (c) MIIP/Fe<sub>3</sub>O<sub>4</sub>@SiO<sub>2</sub>/MCPE (after removal of the template), (d) MIIP/Fe<sub>3</sub>O<sub>4</sub>@SiO<sub>2</sub>/MCPE (before elution of the template), (e) MCPE; (f) N-MIIP/Fe<sub>3</sub>O<sub>4</sub>@SiO<sub>2</sub>/MCPE (impedance spectrum at 2 mmol L<sup>-1</sup> K<sub>3</sub>Fe (CN)<sub>6</sub>/K<sub>4</sub>Fe (CN)<sub>6</sub>).

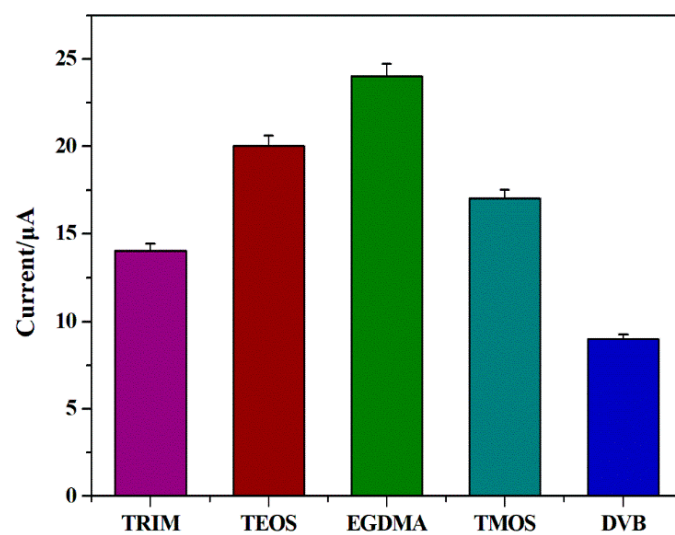

**Figure S4** The current response of the sensor was prepared with different crosslinking agents.

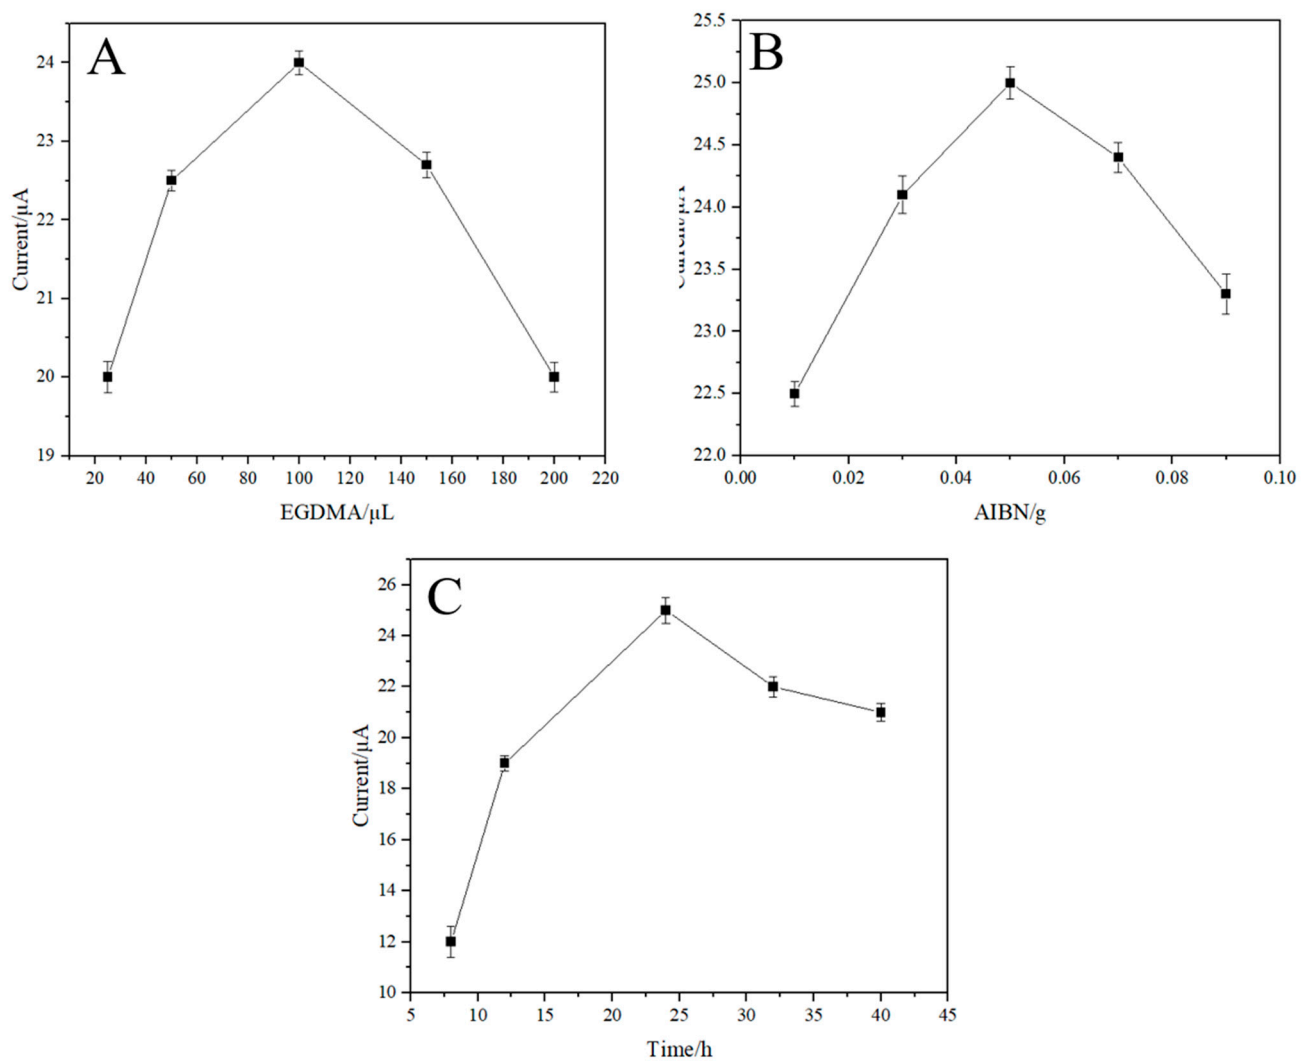

**Figure S5** The amount of crosslinking agent EGDMA (A), the amount of AIBN (B) and the reaction time of forming imprinted membrane (C).

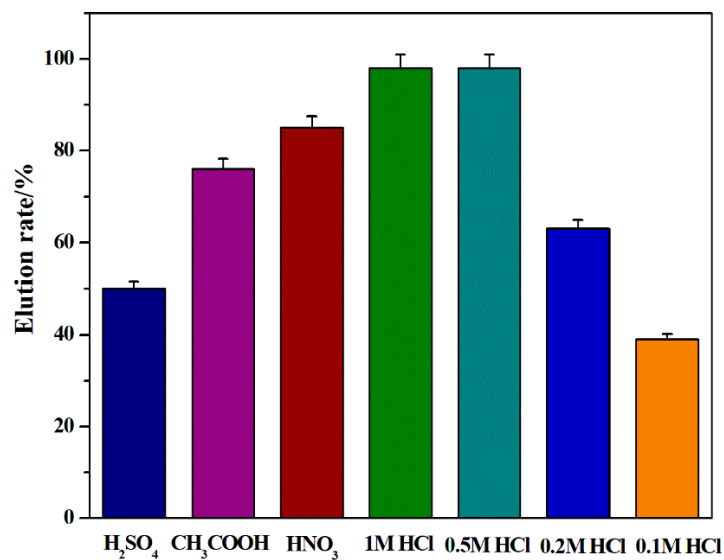

**Figure S6** The effect of inorganic acid eluent on MIIP/Fe<sub>3</sub>O<sub>4</sub>@SiO<sub>2</sub>/MCPE determination of uranyl ions.

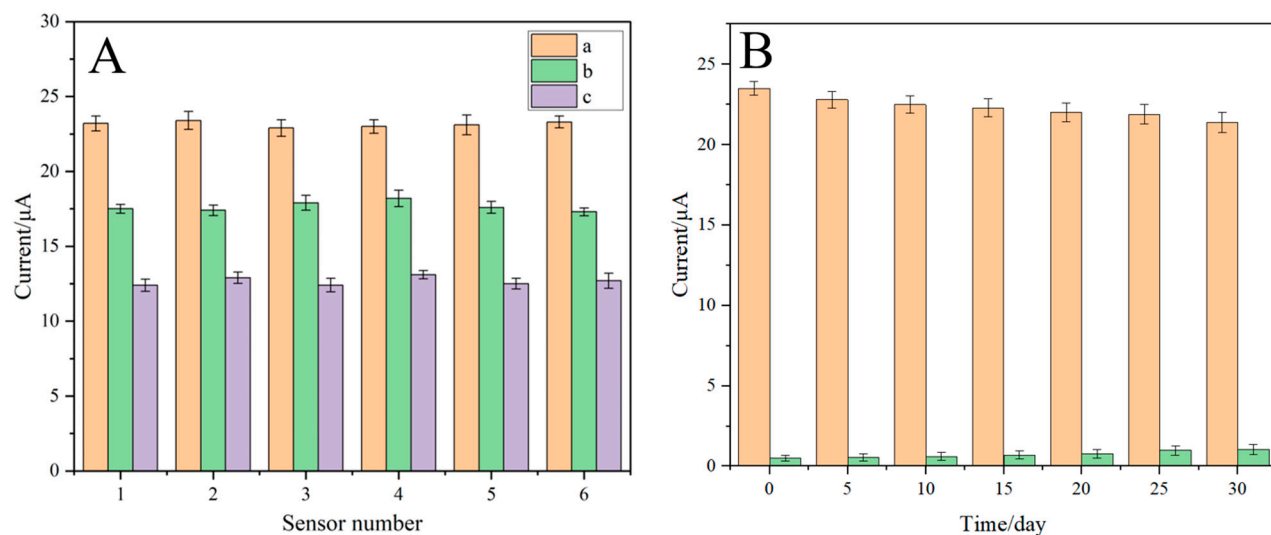

**Figure S7** (A) The effect of repeatability(a: 0.20 mol L<sup>-1</sup>, b: 0.15 mol L<sup>-1</sup>, c: 0.10 mol L<sup>-1</sup> UO<sub>2</sub><sup>2+</sup> solution) on MIIP/Fe<sub>3</sub>O<sub>4</sub>@SiO<sub>2</sub>/MCPE; (B) Stability analysis of the sensing platform under 30 days with 0.15 μM target UO<sub>2</sub><sup>2+</sup> (orange), without target (green). The illustrated error bars represent the standard error of at least three independent measurements. (n=3)
